# Supplementary material
Source: publisher site journal article supplement (https://www.dovepress.com/article/243552)

**Supplementary Figures**

**Supplementary Figure 1.** EMX2OS inhibited proliferation, migration and invasion of PC3 cells and activated cGMP-PKG pathway. The PC3 cells were transfected with EMX2OS overexpression vector, EMX2OS siRNA and respective negative controls, following transfection for 48 h, (A) the EMX2OS overexpression and inhibition efficiencies were detected by qPCR, and cell proliferation (B), invasion (C) and migration (D) were detected with CCK-8 and Transwell assay. The protein levels of PKG1 and PKG2 (E), and the cGMP concentration (F) in supernatant were detected by Western blotting and ELISA. **p*<0.05, ***p*<0.01.


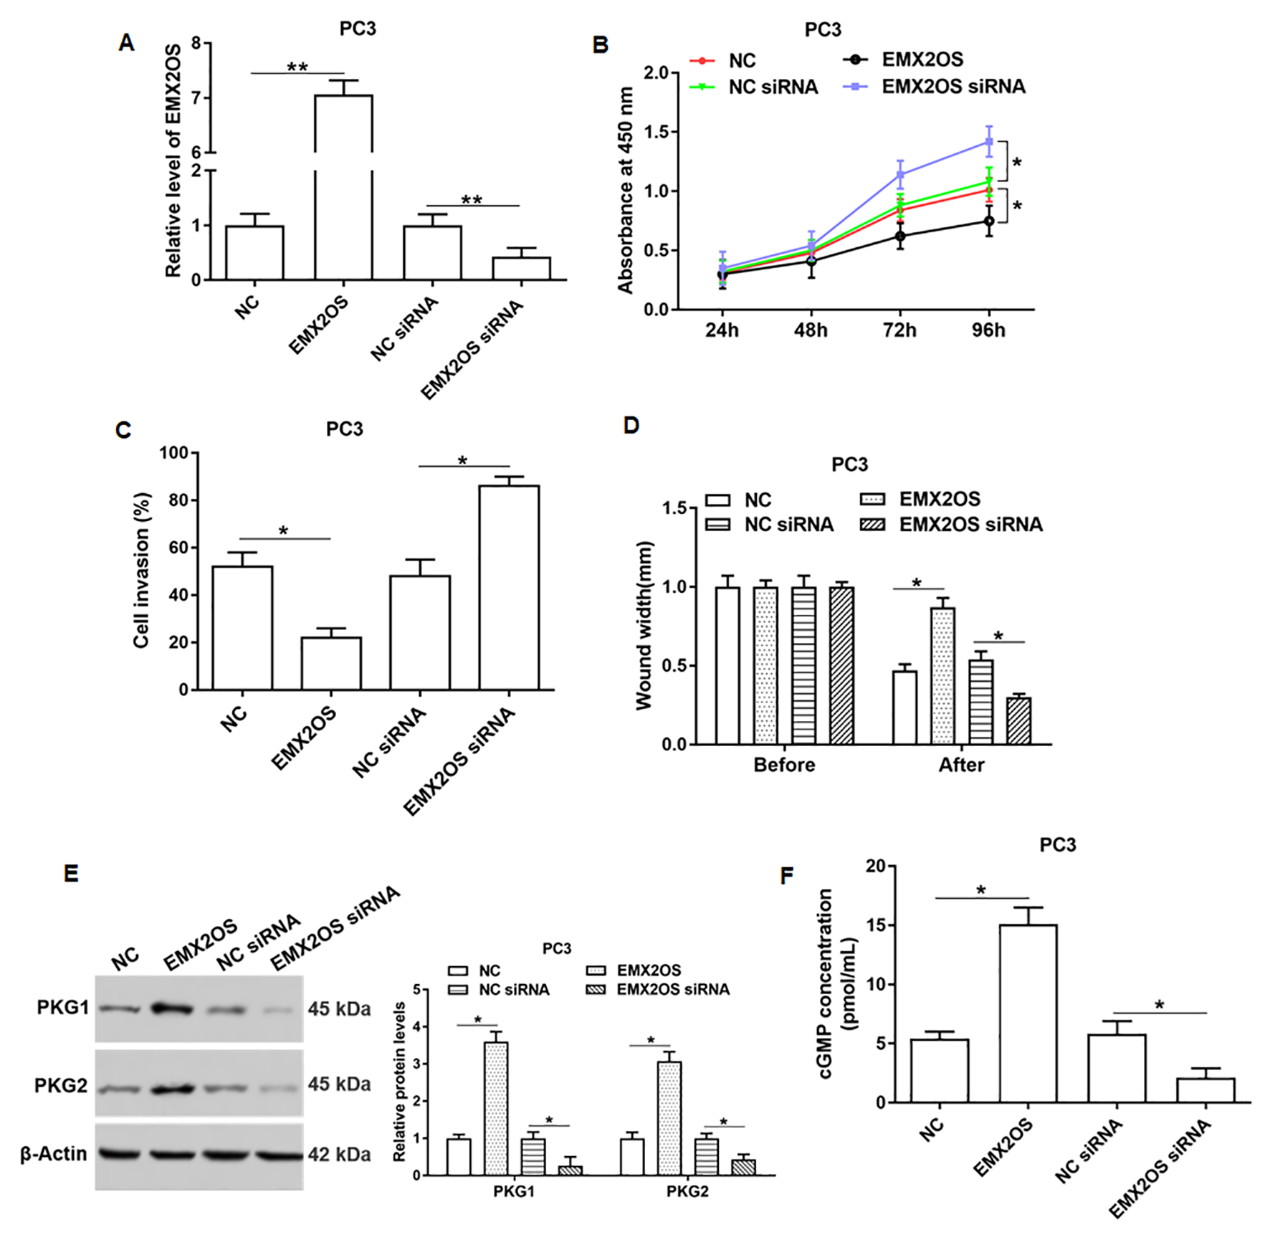


**Supplementary Figure 2.** TCF12 directly bound to EMX2OS promoter. Anti-TCF12 was used to perform ChIP experiments in PC3 cells, and the input chromatin template (20%) was used as a positive control and IgG-precipitated template was used as a specificity control, and the enrichment of EMX2OS promoter sequence was detected by qPCR. ***p*<0.01.


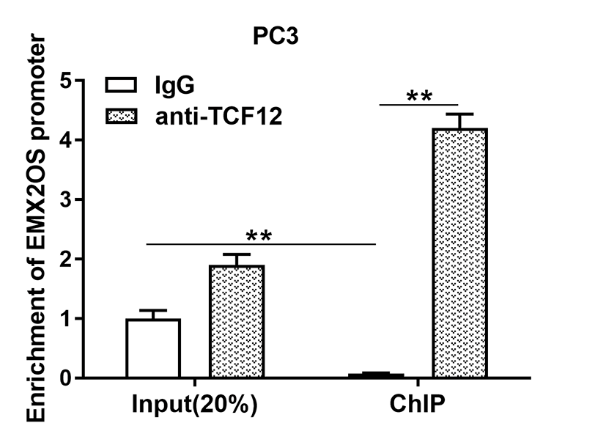


**Supplementary Figure 3.** TCF12 regulated cell proliferation, invasion and migration of PC3 cells. The PC3 cells were transfected with TCF12 overexpression vector, TCF12 siRNA and respective negative controls, following transfection for 48 h, (A) the TCF12 overexpression and inhibition efficiencies were detected by Western blotting, and cell proliferation (B), invasion (C) and migration (D) were detected with CCK-8 and Transwell assay. **p*<0.05, ***p*<0.01.


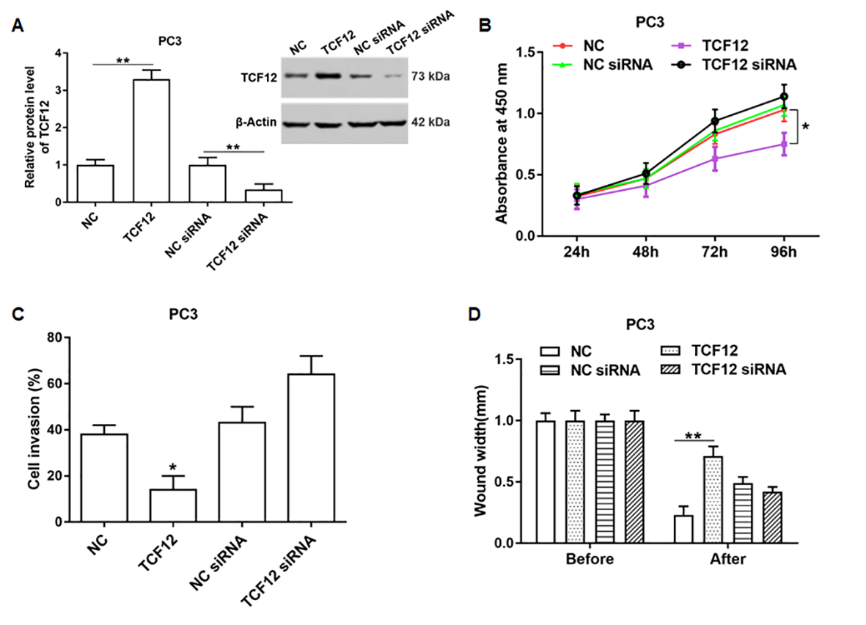


**Supplementary Figure 4.** EMX2OS directly bound with FUS protein in PC3 cells. (A) Binding of EMX2OS and FUS was validated by FUS-antibody based RNA-IP assay. (B) Binding of EMX2OS and FUS was validated by EMX2OS-probe based RNA pull down assay. (C) Binding of EMX2OS and FUS was validated by RNA pull down assay using WT or MUT biotinylated EMX2OS transcripts. **p*<0.05, ***p*<0.01, #*p*<0.05 versus MUT-both group.


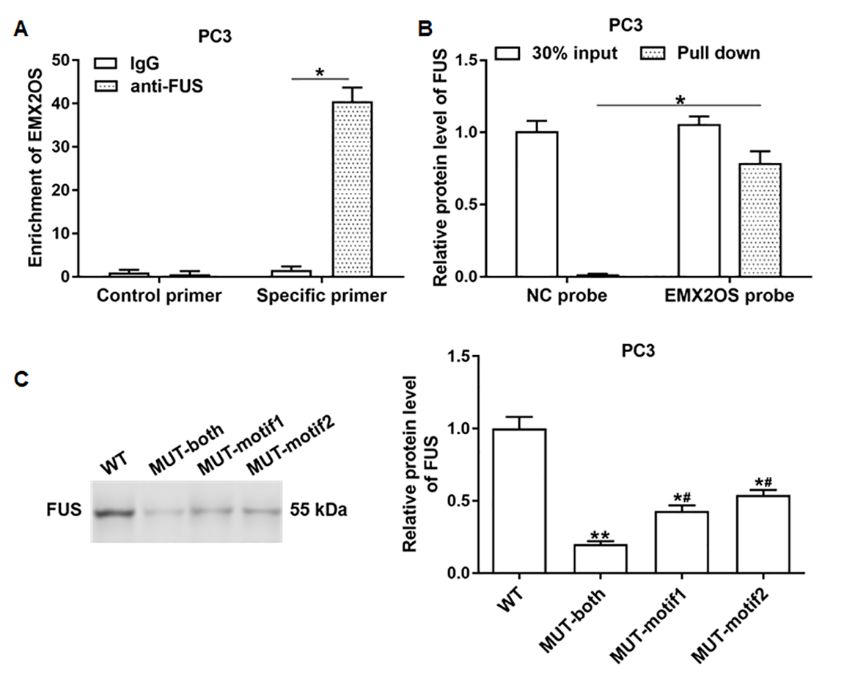


**Supplementary Figure 5.** EMX2OS played synergy effect with FUS protein in PC3 cells. The PC3 cells were transfected with FUS overexpression vector alone or together with EMX2OS overexpression vector, or transfected with FUS siRNA alone or together with EMX2OS siRNA, following transfection for 48 h, (A) the FUS overexpression and inhibition efficiencies were detected by Western blotting. The protein levels of PKG1 and PKG2 (B) and the cGMP concentration (C) in supernatant were detected by Western blotting and ELISA. Cell invasion (D), proliferation (E) and migration (F) were detected with CCK-8 and Transwell assay. **p*<0.05, ***p*<0.01.


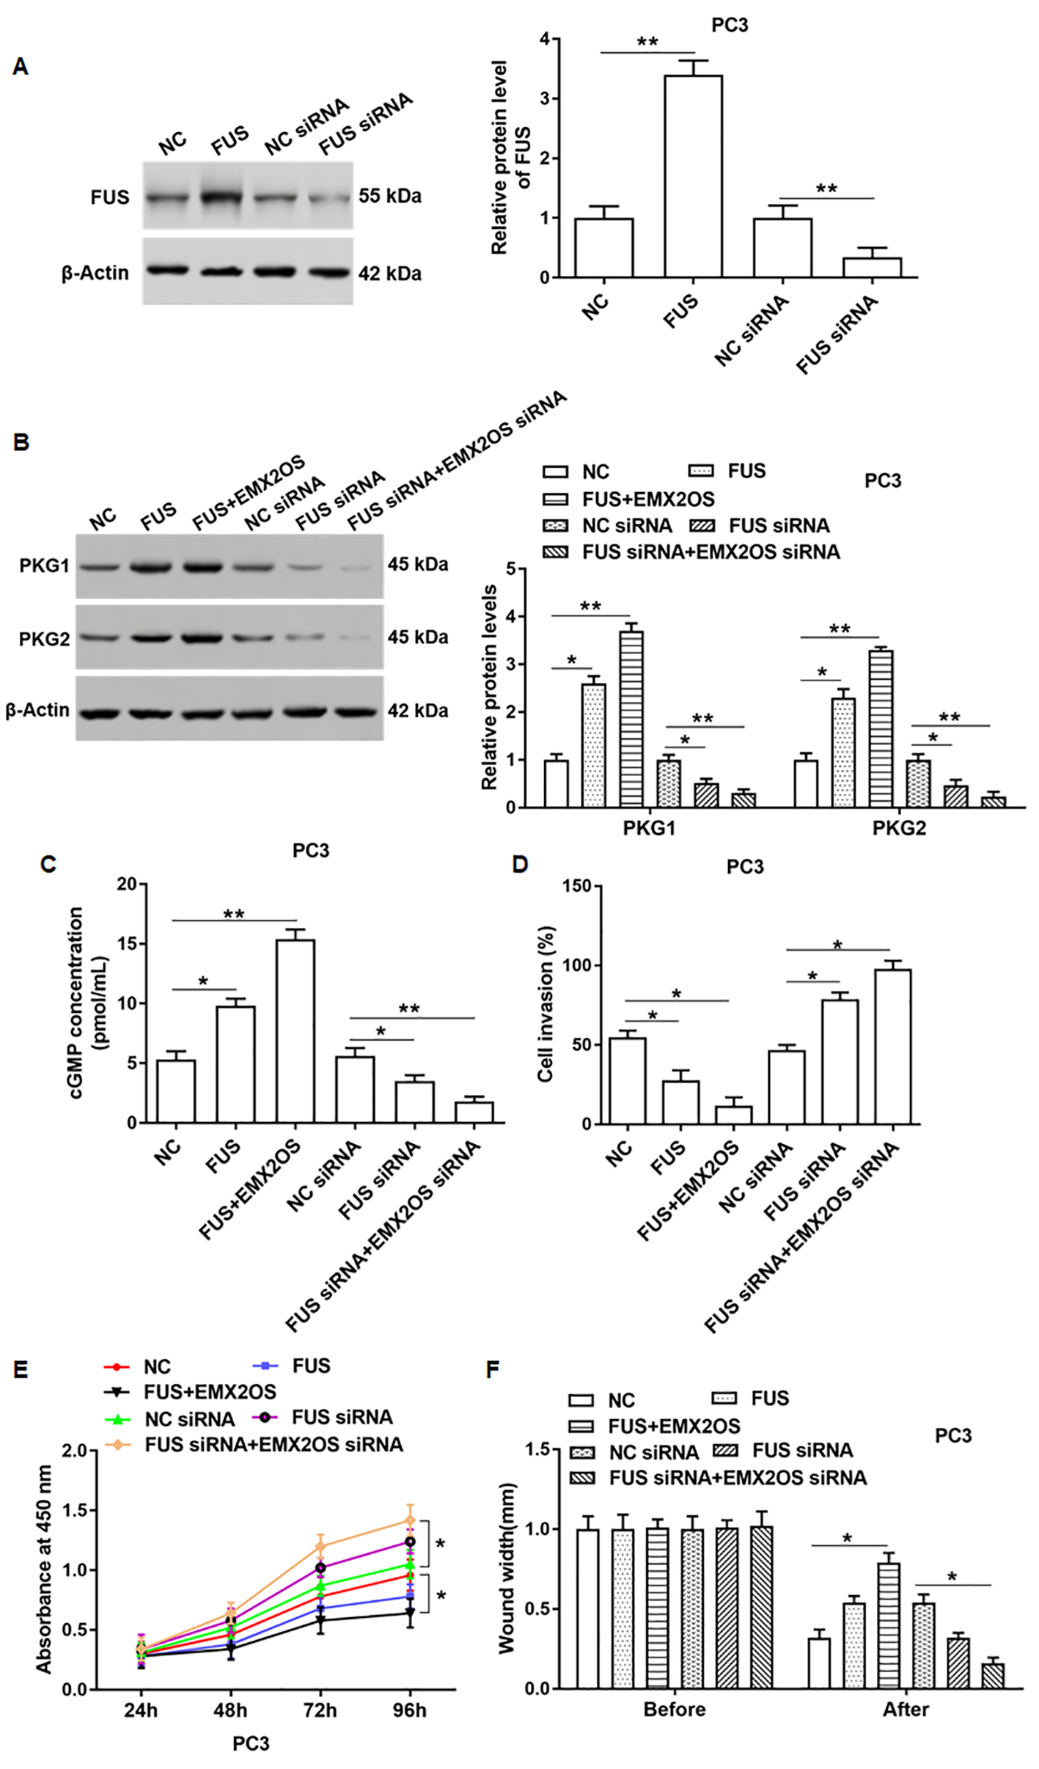


**Supplementary Figure 6**. The effect of FUS and EMX2OS on PC3 cell behaviors was likely to be achieved via the cGMP-PKG pathway. The PC3 cells were transfected with EMX2OS and FUS overexpression vectors, following transfection for 48 h, (D)-DT-2 (2 μM) which was an inhibitor of cGMP-PKG pathway was used to treat cells for 6 h, and then the protein levels of PKG1 and PKG2 (A), and the cGMP concentration (B) in supernatant were detected by Western blotting and ELISA. Cell migration (C), invasion (D) and proliferation (E) were detected with Transwell and CCK-8 assay. **p*<0.05, ***p*<0.01.


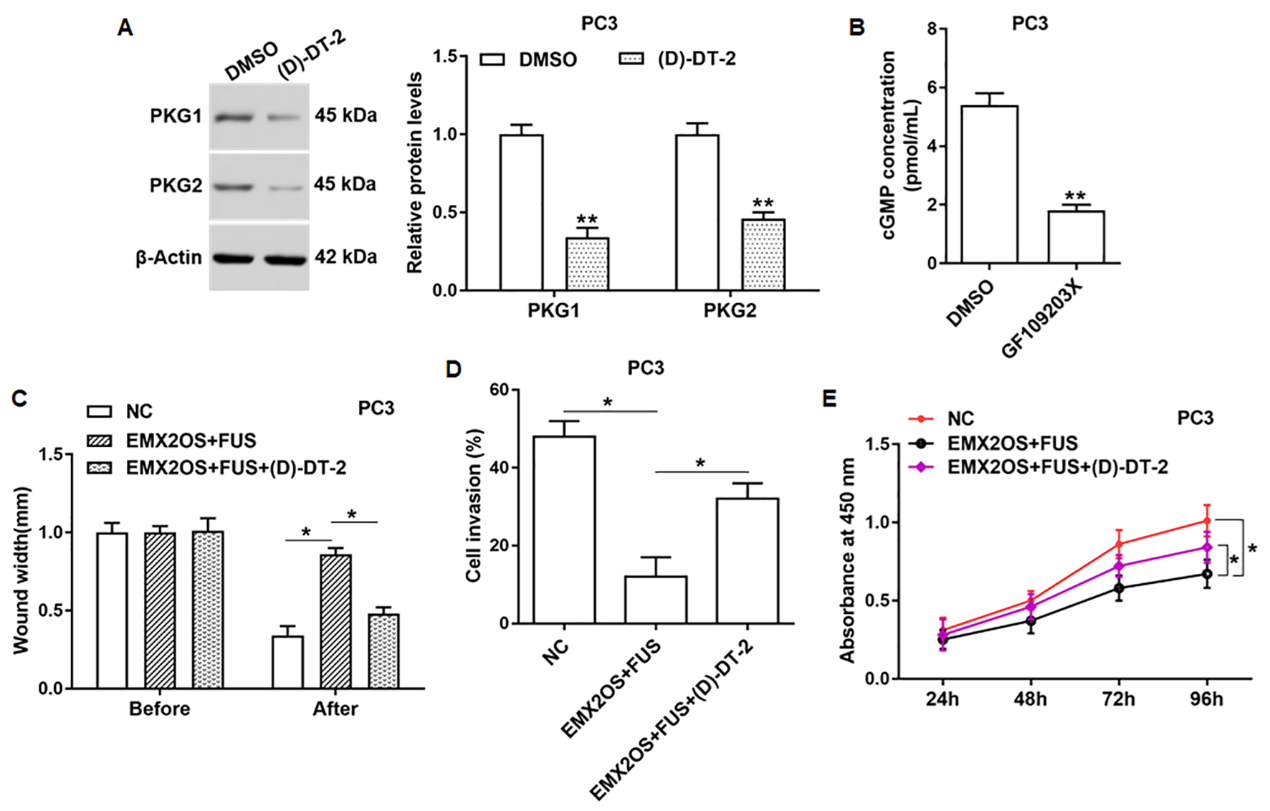

Supplement: Supplementary file 1 [file get_supplementary_file.php]
